# Supplementary material for: Spatial and temporal variations of air pollution over 41 cities of India during the COVID-19 lockdown period
Source: PubMed Central journal article supplement (PMC7539013; doi:10.1038/s41598-020-72271-5), 2020-10-06
Supplement: 41598_2020_72271_MOESM1_ESM.pdf [file 41598_2020_72271_MOESM1_ESM.pdf]

## **Spatial and temporal variations of Air pollution over 41 cities of India during the COVID-19 lockdown period**

Krishna Prasad Vadrevu<sup>1\*</sup>, Aditya Eaturu<sup>2</sup>, Sumalika Biswas<sup>3</sup>, Kristofer Lasko<sup>4</sup>, Saroj Sahu<sup>5</sup>, Garg JK<sup>6</sup> and Chris Justice<sup>7</sup>

<sup>1</sup>NASA Marshall Space Flight Center, Huntsville, Alabama, USA

<sup>2</sup>University of Alabama in Huntsville, USA

<sup>3</sup>Smithsonian Conservation Biology Institute, Virginia, USA

<sup>4</sup>US Army Corps of Engineers, Alexandria, Virginia, USA

<sup>5</sup>Utkal University, Bhubaneswar, Odisha, India

<sup>6</sup>Tata Energy Research Institute (TERI) School of Advanced Studies, New Delhi, India

<sup>7</sup>University of Maryland, College Park, Maryland, USA

### **\*Corresponding Author**

Krishna Prasad Vadrevu<sup>1\*</sup>, NASA Marshall Space Flight Center, Huntsville, Alabama, USA, 35811; Email: [krishna.p.vadrevu@nasa.gov](mailto:krishna.p.vadrevu@nasa.gov)

**Supplementary Table and Figure enclosed (next page)**

| CITY NAME      | X        | Y        | 2019-March 25th to May 3rd Mean NO2 | 2020-March 25th to May 3rd Mean NO2 | Difference % |
|----------------|----------|----------|-------------------------------------|-------------------------------------|--------------|
| Agartala       | 91.26670 | 23.81670 | 1.969E+15                           | 1.969E+15                           | 0%           |
| Ahmadabad      | 72.56687 | 23.03979 | 3.692E+15                           | 1.969E+15                           | -47%         |
| Aizawl         | 92.73330 | 23.66670 | 1.162E+15                           | 1.457E+15                           | 25%          |
| Amritsar       | 74.87156 | 31.63089 | 2.270E+15                           | 1.560E+15                           | -31%         |
| Bangalore      | 77.58773 | 12.97475 | 3.619E+15                           | 1.873E+15                           | -48%         |
| Bhopal         | 77.41200 | 23.23000 | 2.156E+15                           | 1.813E+15                           | -16%         |
| Bhubaneshwar   | 85.83500 | 20.26400 | 2.078E+15                           | 1.855E+15                           | -11%         |
| Chandigarh     | 76.78400 | 30.73800 | 2.614E+15                           | 1.728E+15                           | -34%         |
| Chennai        | 80.24800 | 13.06200 | 2.162E+15                           | 1.301E+15                           | -40%         |
| Cochin         | 76.28042 | 9.97016  | 1.740E+15                           | 1.331E+15                           | -24%         |
| Daman          | 72.85000 | 20.41637 | 1.680E+15                           | 1.391E+15                           | -17%         |
| Delhi          | 77.21666 | 28.66667 | 6.504E+15                           | 2.577E+15                           | -60%         |
| Dispur         | 91.78330 | 26.13330 | 1.837E+15                           | 2.240E+15                           | 22%          |
| Gandhinagar    | 72.66667 | 23.20000 | 3.523E+15                           | 1.915E+15                           | -46%         |
| Gangtok        | 88.61700 | 27.32900 | 8.371E+14                           | 7.829E+14                           | -6%          |
| Hyderabad      | 78.48500 | 17.39500 | 3.740E+15                           | 2.306E+15                           | -38%         |
| Imphal         | 93.94100 | 24.78800 | 1.361E+15                           | 1.572E+15                           | 15%          |
| Itanagar       | 93.55000 | 27.15000 | 9.334E+14                           | 8.792E+14                           | -6%          |
| Jaipur         | 75.80100 | 26.90500 | 2.746E+15                           | 1.885E+15                           | -31%         |
| Kanpur         | 80.31786 | 26.45783 | 2.565E+15                           | 1.957E+15                           | -24%         |
| Kavaratti      | 72.63315 | 10.55095 | 8.792E+14                           | 7.769E+14                           | -12%         |
| Kohima         | 94.11600 | 25.66800 | 1.325E+15                           | 2.222E+15                           | 68%          |
| Kolkata        | 88.33400 | 22.54400 | 3.366E+15                           | 2.818E+15                           | -16%         |
| Lucknow        | 80.92000 | 26.84900 | 2.704E+15                           | 1.939E+15                           | -28%         |
| Madurai        | 78.12173 | 9.91399  | 1.885E+15                           | 1.421E+15                           | -25%         |
| Mangalore      | 74.84300 | 12.86900 | 1.590E+15                           | 1.229E+15                           | -23%         |
| Mumbai         | 72.82600 | 19.07700 | 3.439E+15                           | 1.957E+15                           | -43%         |
| Nagpur         | 79.08911 | 21.15575 | 5.131E+15                           | 2.764E+15                           | -46%         |
| New Delhi      | 77.21675 | 28.56873 | 6.925E+15                           | 2.650E+15                           | -62%         |
| Panaji         | 73.81800 | 15.49200 | 1.439E+15                           | 1.096E+15                           | -24%         |
| Patna          | 85.13500 | 25.61400 | 2.830E+15                           | 2.114E+15                           | -25%         |
| Pondicherry    | 79.83700 | 11.93300 | 1.686E+15                           | 1.283E+15                           | -24%         |
| Port Blair     | 92.75833 | 11.66756 | 6.444E+14                           | 5.667E+14                           | -12%         |
| Pune           | 73.85227 | 18.53574 | 3.174E+15                           | 2.102E+15                           | -34%         |
| Shillong       | 91.88333 | 25.56666 | 1.385E+15                           | 2.451E+15                           | 77%          |
| Silvassa       | 73.00179 | 20.19155 | 1.987E+15                           | 1.608E+15                           | -19%         |
| Simla          | 77.16600 | 31.10400 | 2.005E+15                           | 1.229E+15                           | -39%         |
| Srinagar       | 74.80400 | 34.08100 | 1.608E+15                           | 1.144E+15                           | -29%         |
| Trivandrum     | 76.95200 | 8.50400  | 1.319E+15                           | 1.012E+15                           | -23%         |
| Varanasi       | 82.95634 | 25.28201 | 3.125E+15                           | 2.439E+15                           | -22%         |
| Vishakhapatnam | 83.33000 | 17.75000 | 2.818E+15                           | 2.288E+15                           | -19%         |
| <b>Mean</b>    |          |          |                                     |                                     | <b>-19%</b>  |

Table. NO2 variations in 41 different cities during 2019-non lockdown and 2020 (lockdown period)

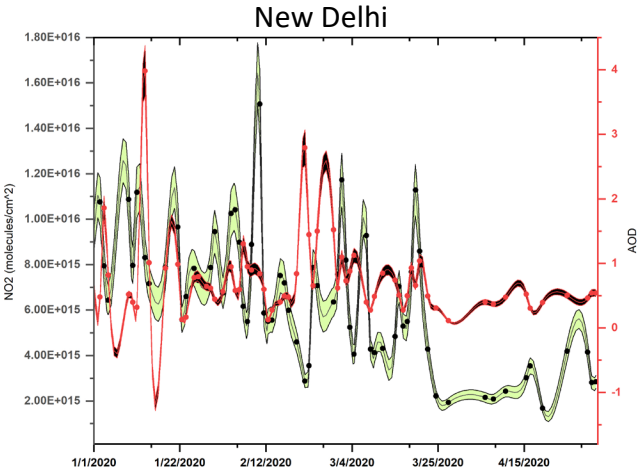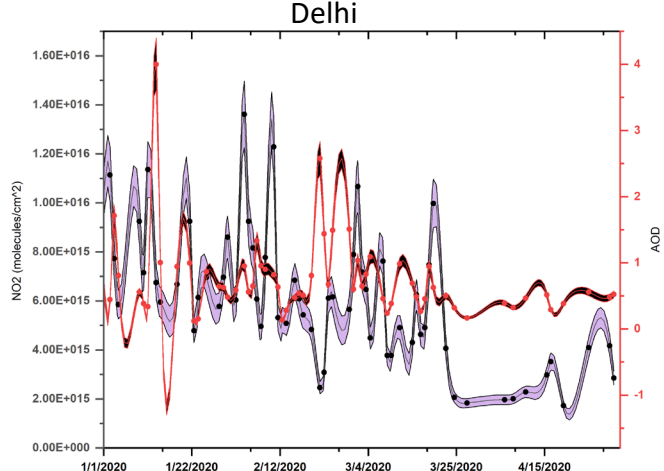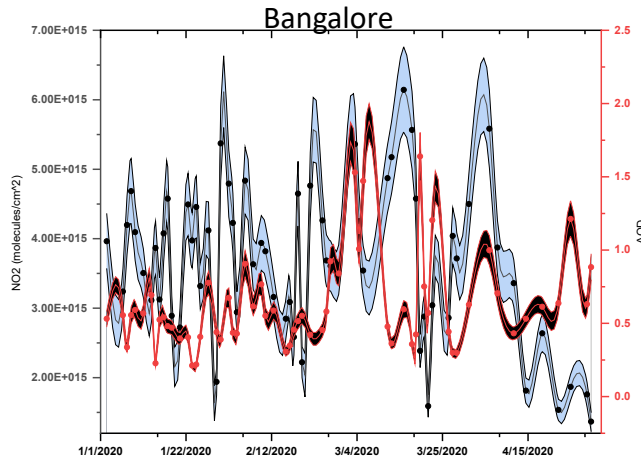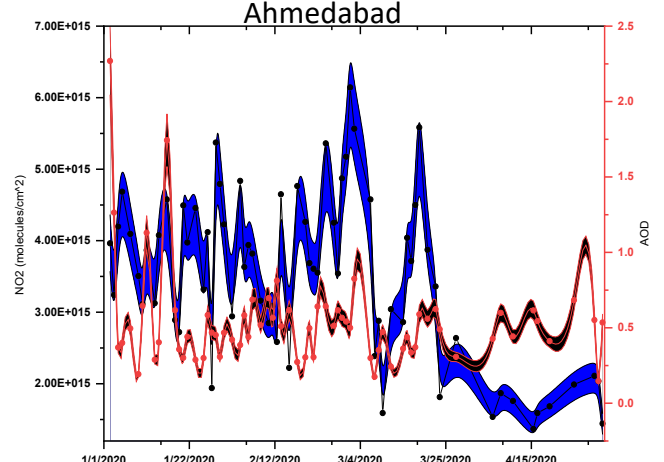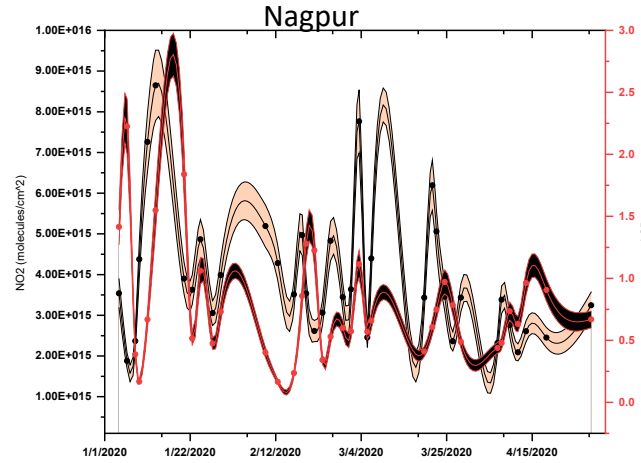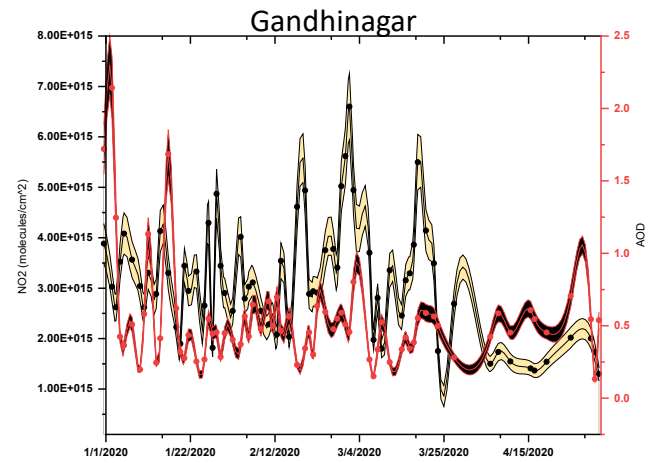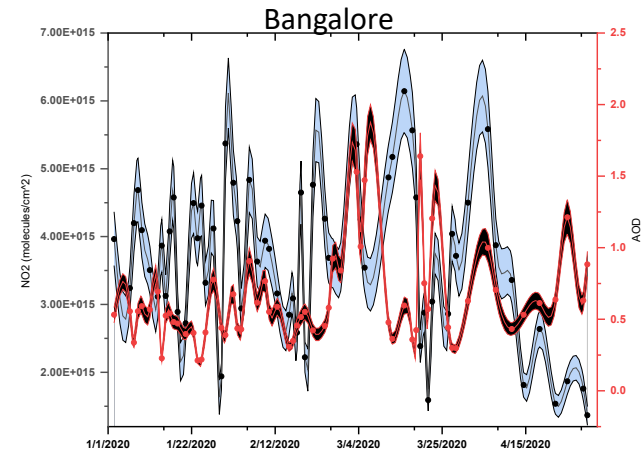

Figure. Time series plots of NO<sub>2</sub> and MODIS datasets with NO<sub>2</sub> data in different colors and MODIS AOD in red line, both with standard errors in different shaded areas. Although the NO<sub>2</sub>-MODIS correlations were not strong, an overall decrease in NO<sub>2</sub> and AOD were observed for different cities during 2020 lockdown period due to COVID-19.
